# Supplementary material for: Genomic Analysis of Sphingopyxis sp. USTB-05 for Biodegrading Cyanobacterial Hepatotoxins
Source: MDPI journal article supplement (doi:10.3390/toxins14050333), 2022-05-09
Supplement: s1 [file s1]

# Genomic Analysis of *Sphingopyxis* sp. USTB-05 for Biodegrading Cyanobacterial Hepatotoxins

Chao Liu, Qianqian Xu, Zhenzhen Zhao, Haiyang Zhang, Xiaolu Liu, Chunhua Yin, Yang Liu, and Hai Yan

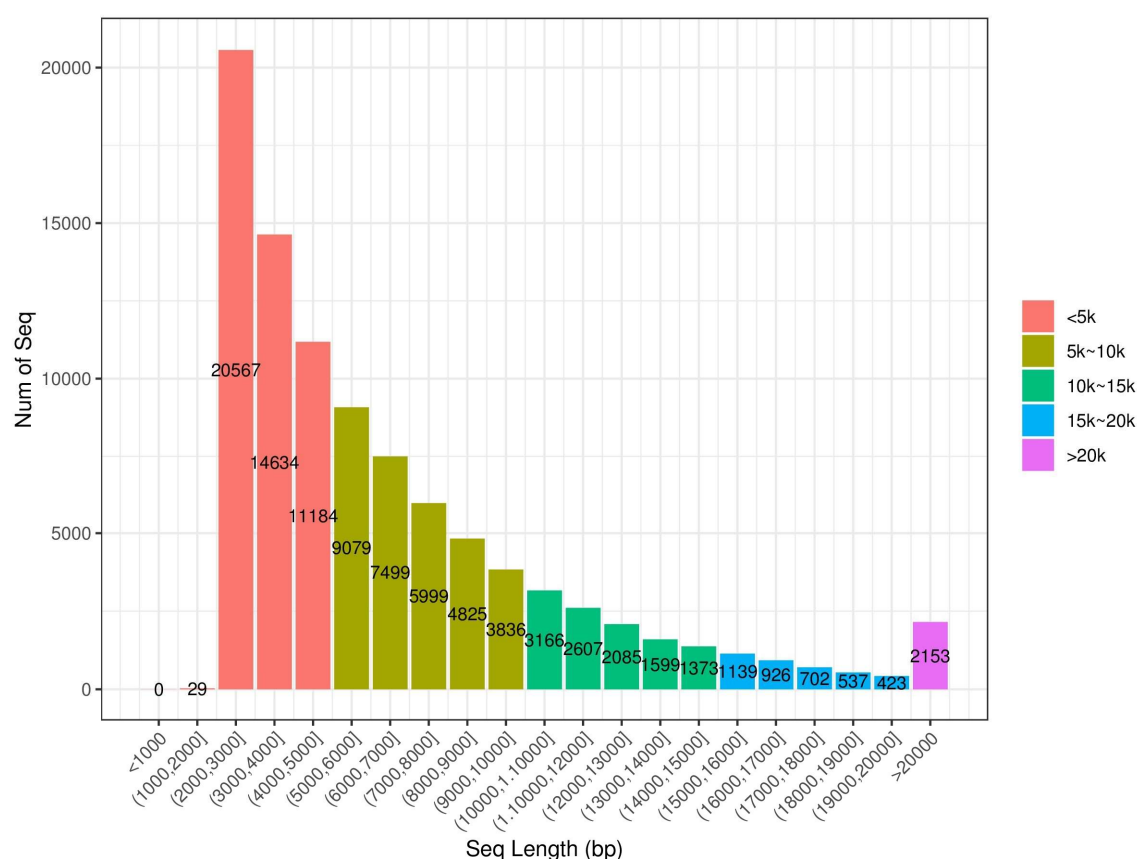

**Figure S1.** The length of the three generations of nanopore data is distributed in turn.

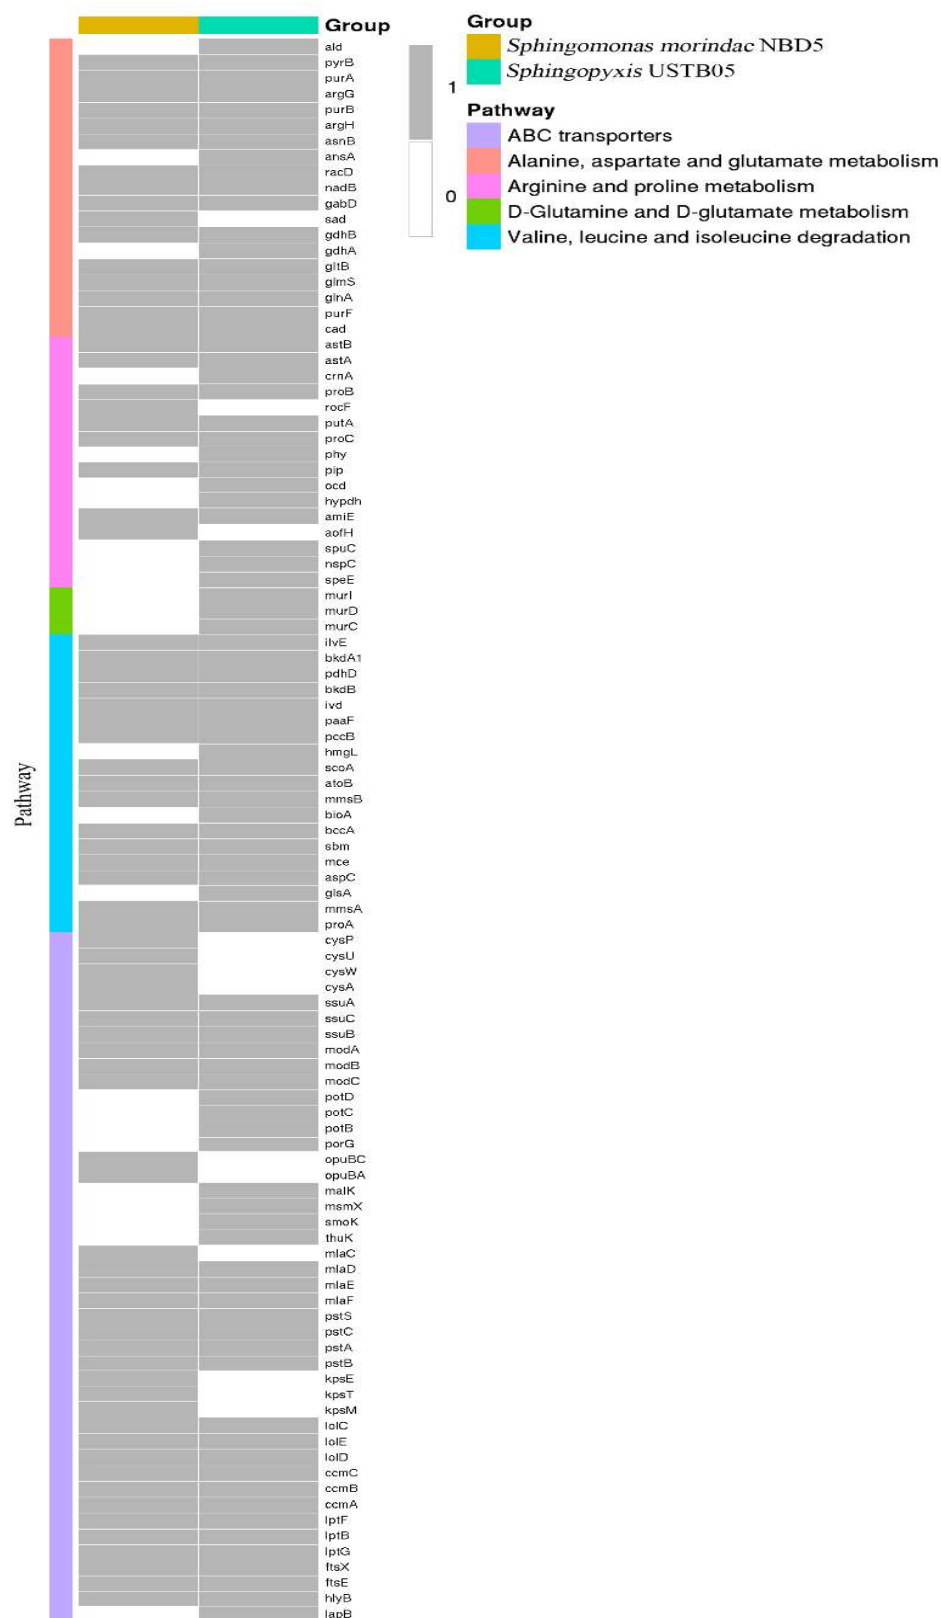

**Figure S2.** Comparison of genes related to hepatotoxin biodegradation in the genomes of *Sphingomonas morindae* sp. NBD5 and *Sphingopyxis* sp. USTB-05. The gray box in the figure indicate that the gene exists in two strains, and the white indicate that the gene does not exist in two strains.
